# Supplementary material
Source: PubMed Central journal article supplement (PMC5344767)
Supplement: NIHMS815707-supplement.pdf [file NIHMS815707-supplement.pdf]

## **Urinary microbiome of kidney transplant patients reveals dysbiosis with potential for antibiotic resistance**

Asha Rani, PhD<sup>1§</sup>, Ravi Ranjan PhD<sup>1§</sup>, Halvor S. McGee, PhD<sup>1</sup>, Kalista E. Andropolis, MS<sup>1</sup>, Dipti V. Panchal, MS<sup>1</sup>, Zahraa Hajjiri, MD<sup>1</sup>, Daniel C. Brennan, MD<sup>2</sup>, Patricia W. Finn, MD<sup>1</sup>, David L. Perkins, MD, PhD<sup>1,3,\*</sup>

<sup>1</sup>Department of Medicine, University of Illinois, Chicago, IL 60612 USA

<sup>2</sup>Division of Renal Diseases, Washington University School of Medicine, St. Louis, MO 63110 USA

<sup>3</sup>Department of Surgery, University of Illinois, Chicago, IL 60612 USA

### **\*Corresponding author:**

David Perkins, MD, PhD

University of Illinois at Chicago

Department of Medicine, MC 787

840 S Wood Street, Suite 1020N CSB

Chicago IL 60612 USA

Email: [perkinsd@uic.edu](mailto:perkinsd@uic.edu) , Phone: 312-413-3382, Fax: 312-355-0499

<sup>§</sup>These authors contributed equally and considered as co-first authors.

### **RUNNING HEAD**

Urinary microbiome of kidney transplant patients

### **SUPPORTING FIGURE**

Figure S1 to S7

### **SUPPORTING TABLE**

Table S1 to S6

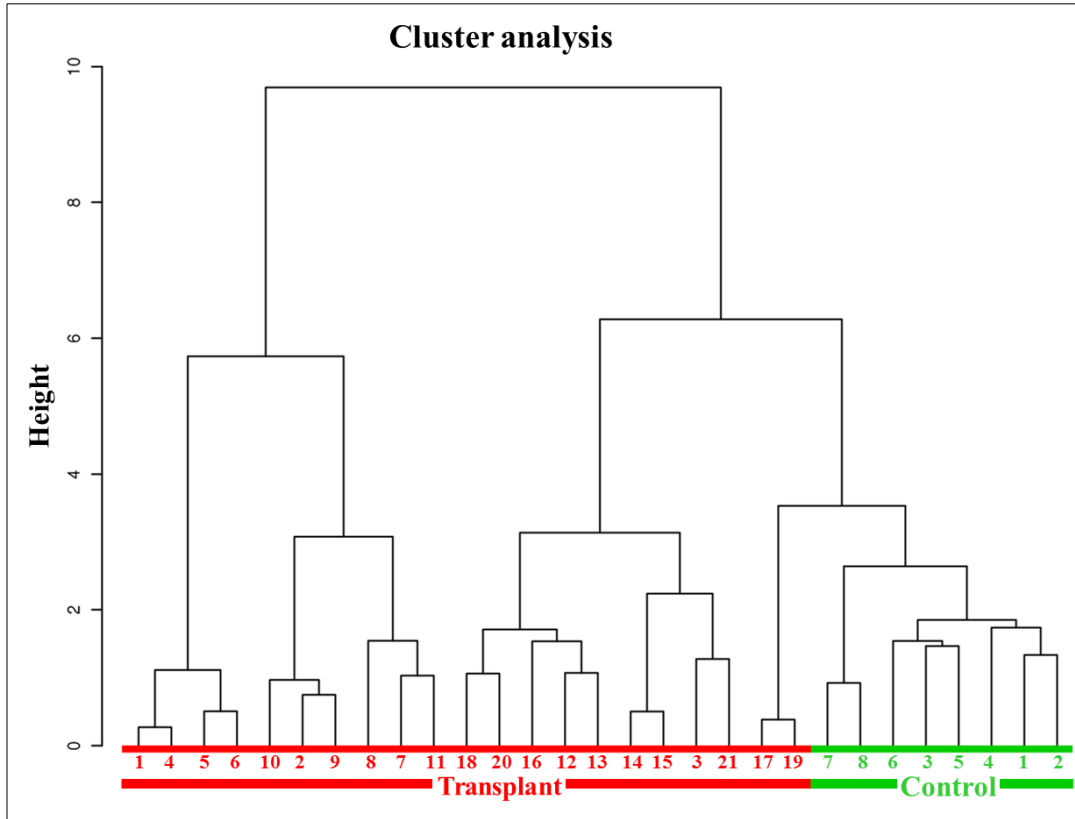

**Figure S1. Dendrogram of the urine microbiome.** The dendrogram is based on hierarchical clustering of transplant and control groups using the Ward method with the Pearson's correlation distance metric.

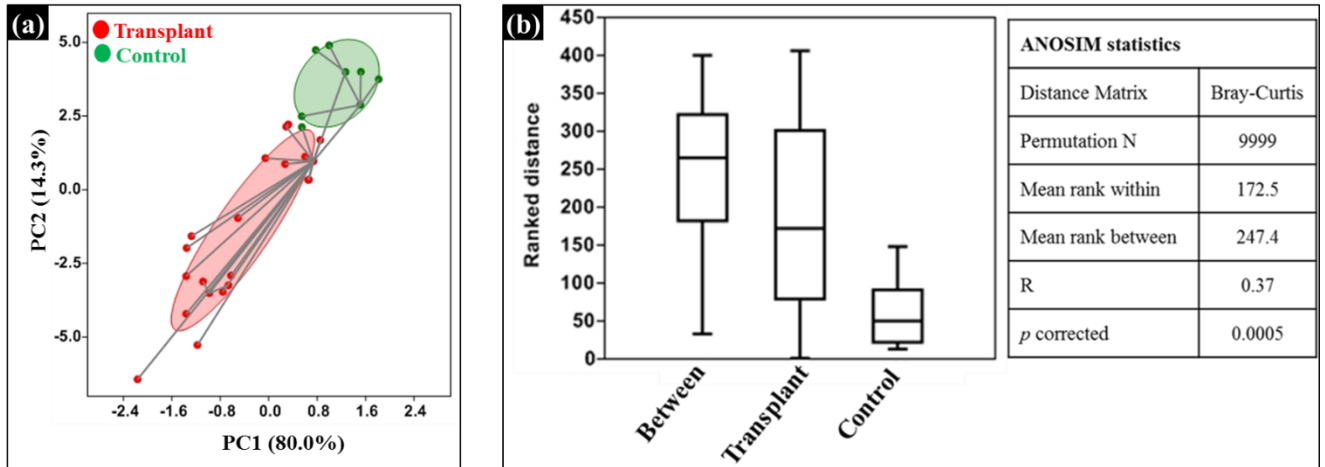

**Figure S2. Multivariate analysis of microbial diversity.** (a) Partial least squares discriminant analysis (PLS-DA) of the bacterial species in transplant and control group. The percentage of total variance explained by PC1 and PC2 are noted in both the axis labels. (b) ANOSIM (Analysis of Similarity) test showed that the within-group variability was low compared to between-group variability.

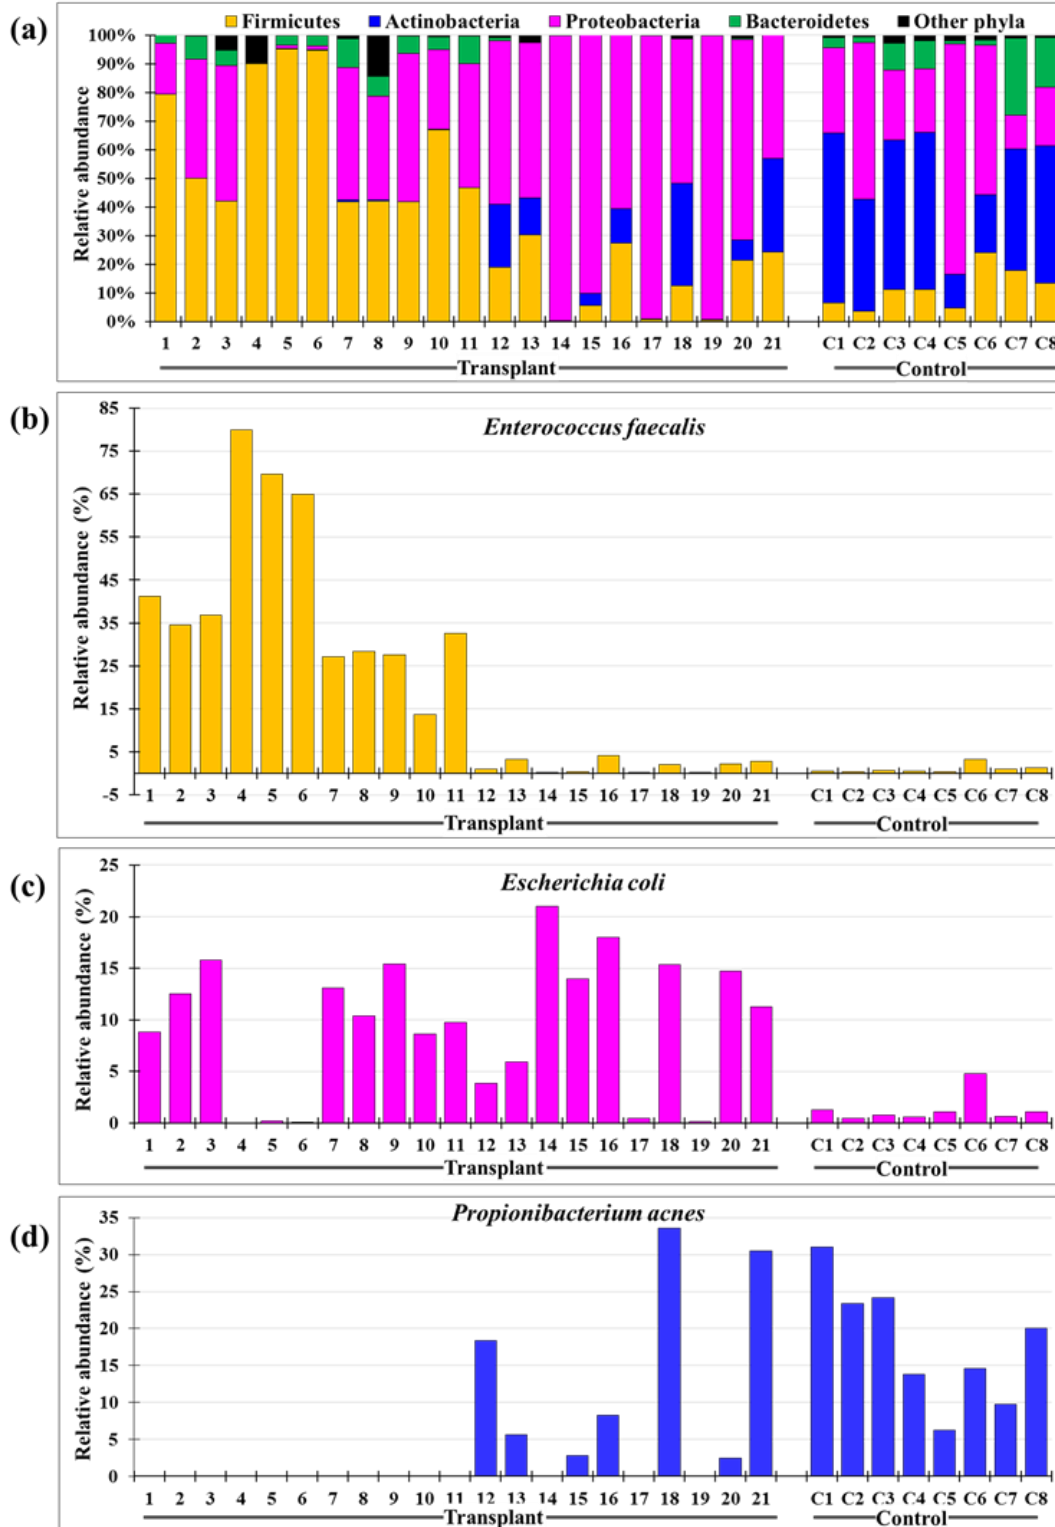

**Figure S3. Microbial diversity profile of transplant and control group.** (a) Stacked bar chart representation of relative abundance of four dominant phyla. Relative abundance of *E. faecalis* (b), *E. coli* (c), and *P. acnes* (d) for individual samples in transplant and control group. The color of the bar graph (species) represent the phylum which they belong (stacked bar graph).

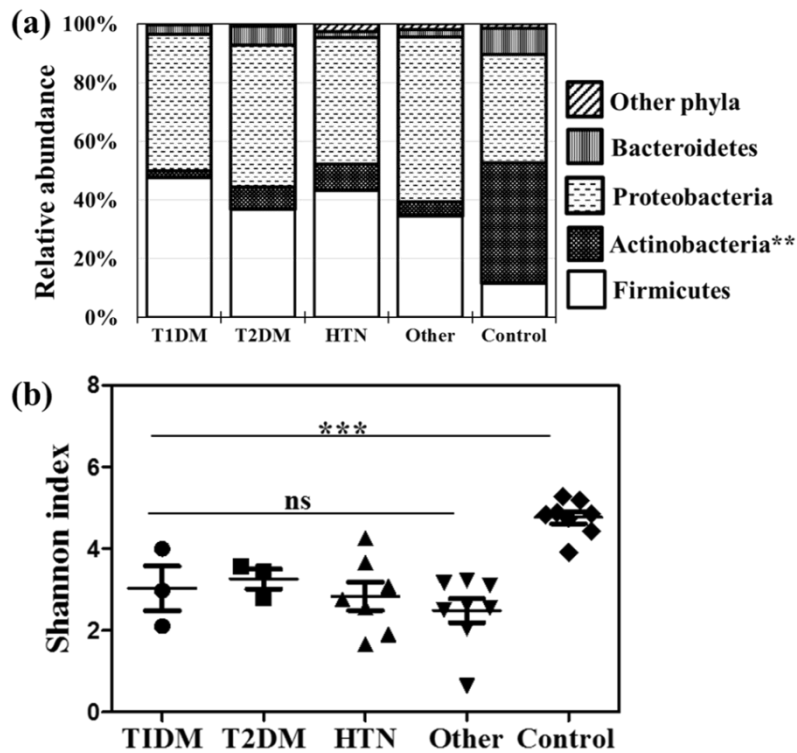

**Figure S4. Bacterial phyla and microbial diversity in different diagnostic groups. (a)** Relative abundances of the 4 dominant bacterial phyla detected in different transplant diagnoses compared to control. The other phyla category contains phyla with < 2% abundance. The significance of the difference was computed using ANOVA with Tukey’s multiple comparison test. Asterisks indicate significant differences at phylum level (\*\* $p < 0.001$ ). **(b)** Shannon diversity index in 4 clinical diagnoses compared to control, and is significantly different in control group compared to 4 transplant diagnosis categories. No significant differences were observed among the 4 transplant diagnosis categories. “Other” includes the combined category for FSGS, PKD, RN, Lupus and vasculitis (Table 1). The significance of the difference was computed using ANOVA with Tukey’s multiple comparison test. Asterisks indicate significant differences at species level (\*\* $p < 0.0001$ ), see Supplementary Table 6.

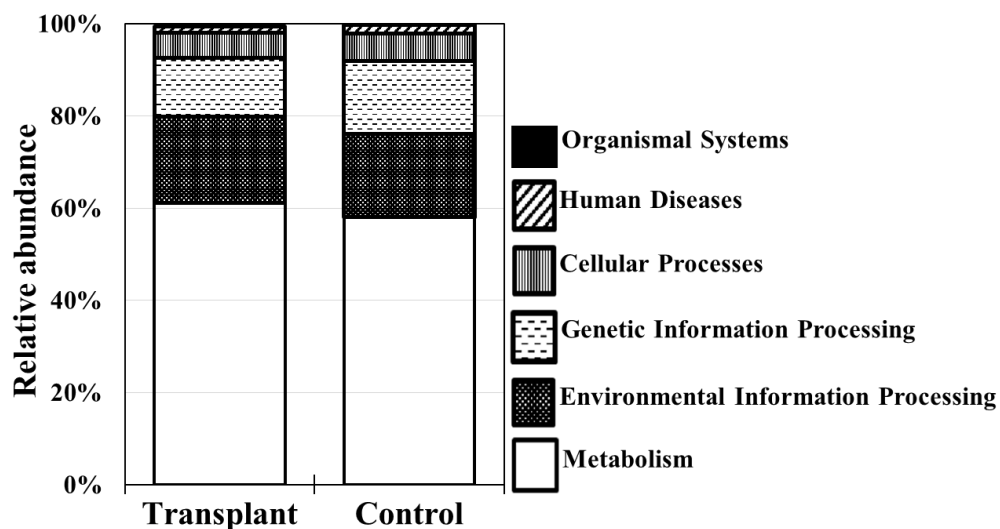

**Figure S5. No change in the level 1 KEGG functional pathway categories between the transplant and control urine.** Shown are relative abundance of KEGG assignments for the level 1 KEGG categories identified in transplant and control group. Both groups are highly enriched for metabolism and environmental information processing categories. No significant differences between the groups were observed at Level 1.

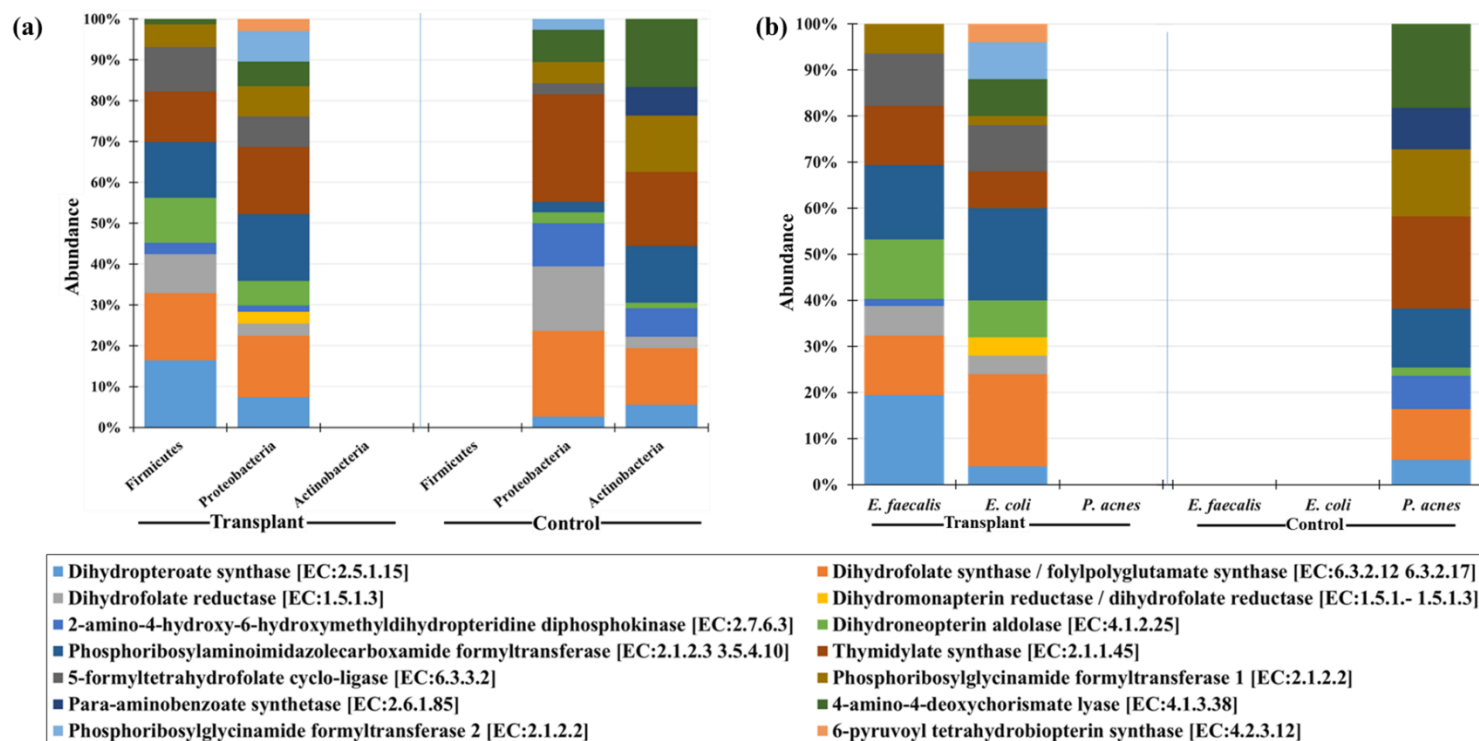

**Figure S6. Abundance of folate biosynthesis pathway genes identified in transplant and control group.** (a) Relative abundance of folate pathway genes compared among; (a) major phyla – Firmicutes, Proteobacteria, and Actinobacteria, (b) Bacterial species – *E. faecalis*, *E. coli*, and *P. acnes* representing the respective phyla.

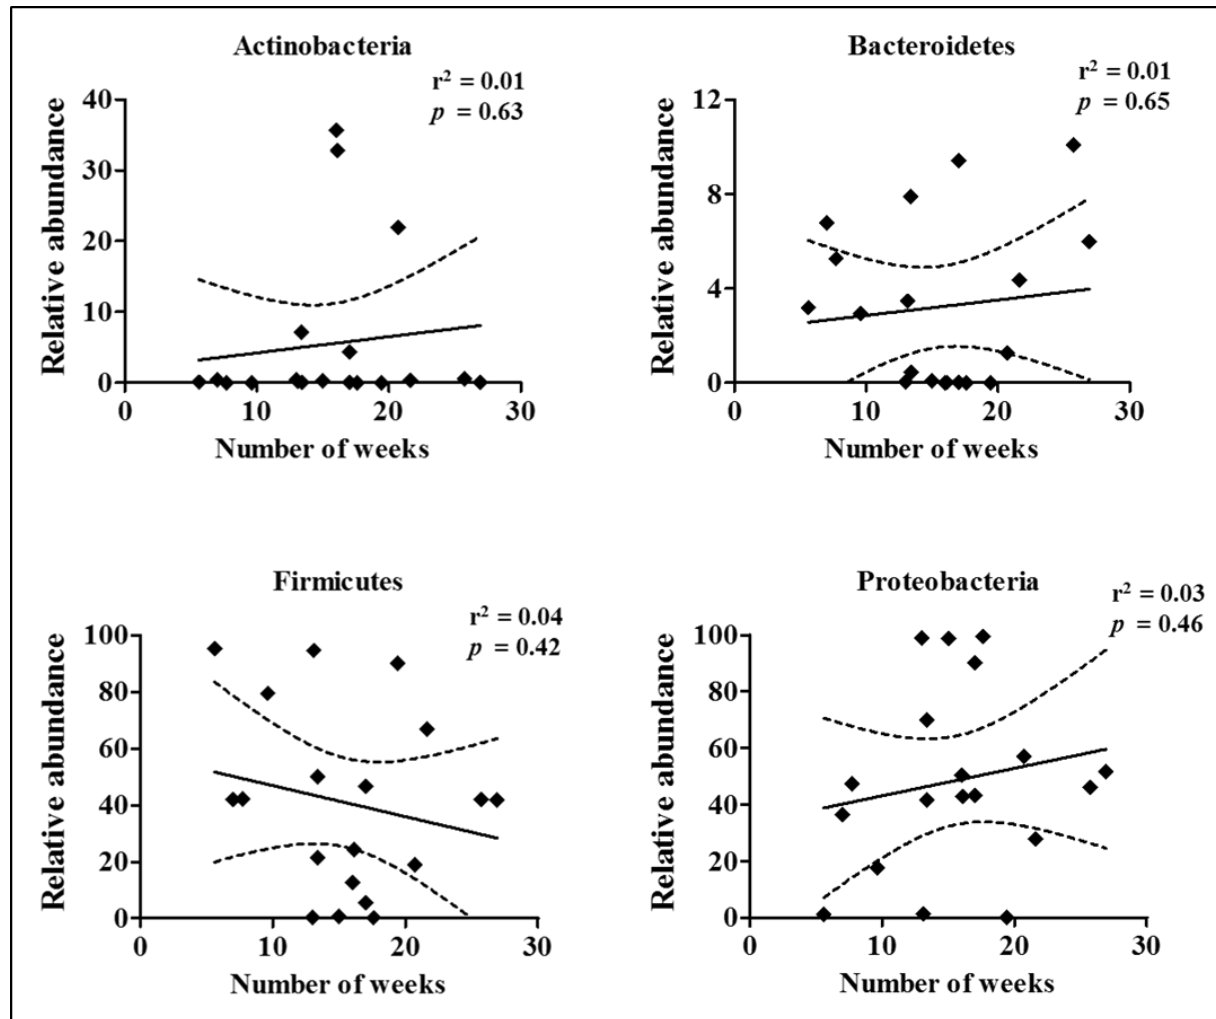

**Figure S7. Correlation analysis.** The correlation analysis using linear regression of sample collection time points with the relative abundance of major bacterial phyla identified in the urine samples. No significant correlation was observed.



**Table S1. Statistics of metagenomics data.**

| Sample name | Number of reads    | Reads used for contig assembly | No. of contigs                   |
|-------------|--------------------|--------------------------------|----------------------------------|
| 1           | 7849916            | 7814972                        | 47                               |
| 2           | 21803762           | 5819208                        | 2471                             |
| 3           | 10327248           | 10325043                       | 25                               |
| 4           | 12785361           | 12039222                       | 14                               |
| 5           | 7433295            | 7419132                        | 374                              |
| 6           | 8174663            | 8150995                        | 312                              |
| 7           | 34818382           | 3134361                        | 7487                             |
| 8           | 27420614           | 4565511                        | 4935                             |
| 9           | 31903768           | 6576452                        | 2417                             |
| 10          | 28570804           | 8361721                        | 6376                             |
| 11          | 35156390           | 5717893                        | 5503                             |
| 12          | 642591             | 503045                         | 2661                             |
| 13          | 392172             | 310036                         | 3306                             |
| 14          | 281816             | 171627                         | 4799                             |
| 15          | 399222             | 298956                         | 1992                             |
| 16          | 580114             | 464905                         | 2164                             |
| 17          | 689472             | 519830                         | 8874                             |
| 18          | 881827             | 656455                         | 3234                             |
| 19          | 446857             | 324868                         | 8414                             |
| 20          | 563269             | 485818                         | 1604                             |
| 21          | 295740             | 225778                         | 1611                             |
| C1          | 7545864            | 5145175                        | 10732                            |
| C2          | 5384830            | 4007780                        | 14516                            |
| C3          | 9235514            | 5503626                        | 15563                            |
| C4          | 9790696            | 5349040                        | 16247                            |
| C5          | 8187139            | 5957934                        | 13343                            |
| C6          | 8043242            | 4598491                        | 5387                             |
| C7          | 4690991            | 2233658                        | 3041                             |
| C8          | 3756888            | 1830113                        | 2898                             |
| Group       | Number of reads    | Reads used for analysis        | Total number of contigs analyzed |
| Transplant  | 11019870 ± 2852048 | 3995000 ± 860800               | 68620                            |
| Control     | 7079396 ± 779065   | 4328000 ± 543600               | 81727                            |

Total number of reads include raw sequence reads for each sample. Reads used for analysis includes sequences retained after quality filter and human sequence removal. Number of reads for each group are shown as mean ± SEM.

**Table S2. Abundance of bacterial genera.**

| <b>Transplant</b>          |                    |
|----------------------------|--------------------|
| <b>Genus</b>               | <b>% Abundance</b> |
| <i>Enterococcus</i> *      | <b>28.62</b>       |
| <i>Escherichia</i> *       | <b>12.67</b>       |
| <i>Ralstonia</i>           | <b>9.56</b>        |
| <i>Shigella</i> *          | 7.43               |
| <i>Propionibacterium</i> * | <b>4.85</b>        |
| <i>Proteus</i>             | 4.45               |
| <i>Streptococcus</i>       | <b>3.41</b>        |
| <i>Lactobacillus</i> *     | 2.85               |
| <i>Bacteroides</i>         | <b>2.40</b>        |
| <i>Neisseria</i>           | <b>2.22</b>        |
| <i>Salmonella</i>          | 1.64               |
| <i>Burkholderia</i>        | <b>1.30</b>        |
| <i>Staphylococcus</i> *    | 1.17               |
| <i>Citrobacter</i> *       | 1.12               |

| <b>Control</b>             |                    |
|----------------------------|--------------------|
| <b>Genus</b>               | <b>% Abundance</b> |
| <i>Propionibacterium</i> * | <b>18.48</b>       |
| <i>Corynebacterium</i> *   | 10.55              |
| <i>Ralstonia</i>           | <b>7.58</b>        |
| <i>Neisseria</i>           | <b>7.27</b>        |
| <i>Streptococcus</i>       | <b>3.23</b>        |
| <i>Prevotella</i>          | 2.65               |
| <i>Bacteroides</i>         | <b>2.55</b>        |
| <i>Mobiluncus</i> *        | 2.44               |
| <i>Porphyromonas</i>       | 2.20               |
| <i>Enterococcus</i> *      | <b>2.18</b>        |
| <i>Pseudomonas</i>         | 2.11               |
| <i>Burkholderia</i>        | <b>1.65</b>        |
| <i>Enhydrobacter</i>       | 1.51               |
| <i>Escherichia</i> *       | <b>1.39</b>        |

Bacterial genera identified in transplant and control group (selected on the basis of >1% abundance in each group). Genus identified in both the groups are shown in bold letters, whereas non-bold are the genera specific to each group. The significance of the difference among bacterial genera was computed using Wilcoxon Rank test (\**p* corrected < 0.05).

**Table S3. Richness and diversity measures of urine microbiome.**

| Diversity estimators    | Transplant |         | Control |         |
|-------------------------|------------|---------|---------|---------|
|                         | Mean       | Min–Max | Mean    | Min–Max |
| Shannon index***        | 2.8±0.2    | 0.6-4.3 | 4.8±0.2 | 3.9-5.3 |
| Inverse Simpson index** | 0.8±0.0    | 0.3-0.9 | 0.9±0.0 | 0.8-0.9 |
| Evenness                | 0.6±0.0    | 0.3-0.9 | 0.7±0.0 | 0.6-0.8 |

Richness and diversity measures of urine microbiome including the Shannon index, Inverse Simpson index, and evenness are shown. The index values are shown as group mean ± SD. The significance of the difference was computed using Mann Whitney *U* test (\*\* $p < 0.001$ , \*\*\* $p < 0.0001$ ).

**Table S4. Abundance of bacterial species in each diagnostic category.**

| T1DM                            |             | T2DM                              |             | HTN                             |             | Other                            |             |
|---------------------------------|-------------|-----------------------------------|-------------|---------------------------------|-------------|----------------------------------|-------------|
| Species                         | % Abundance | Species                           | % Abundance | Species                         | % Abundance | Species                          | % Abundance |
| <i>Enterococcus faecalis</i>    | 23.64       | <i>Enterococcus faecalis</i>      | 20.91       | <i>Enterococcus faecalis</i>    | 24.63       | <i>Enterococcus faecalis</i>     | 20.83       |
| <i>Escherichia coli</i>         | 12.97       | <i>Escherichia coli</i>           | 9.80        | <i>Escherichia coli</i>         | 7.21        | <i>Escherichia coli</i>          | 10.08       |
| <i>Enterococcus</i> sp.         | 4.10        | <i>Propionibacterium acnes</i>    | 6.14        | <i>Propionibacterium acnes</i>  | 6.80        | <i>Proteus mirabilis</i>         | 9.69        |
| <i>Enterococcus</i> sp. 7L76    | 3.89        | <i>Ralstonia pickettii</i>        | 4.60        | <i>Ralstonia pickettii</i>      | 5.59        | <i>Propionibacterium acnes</i>   | 4.16        |
| <i>Bacteroides vulgatus</i>     | 2.86        | <i>Bacteroides vulgatus</i>       | 4.39        | <i>Ralstonia solanacearum</i>   | 4.47        | <i>Ralstonia pickettii</i>       | 3.80        |
| <i>Salmonella enterica</i>      | 2.83        | <i>Escherichia</i> sp. 4_1_40B    | 3.45        | <i>Enterococcus faecium</i>     | 2.94        | <i>Ralstonia solanacearum</i>    | 3.62        |
| <i>Shigella dysenteriae</i>     | 2.29        | <i>Enterococcus</i> sp.           | 3.21        | <i>Bacteroides vulgatus</i>     | 1.79        | <i>Lactobacillus crispatus</i>   | 3.07        |
| <i>Escherichia</i> sp. 4_1_40B  | 2.26        | <i>Enterococcus</i> sp. 7L76      | 2.50        | <i>Salmonella enterica</i>      | 1.62        | <i>Bacteroides vulgatus</i>      | 1.92        |
| <i>Ralstonia pickettii</i>      | 2.18        | <i>Ralstonia solanacearum</i>     | 1.88        | <i>Enterococcus</i> sp.         | 1.57        | <i>Shigella sonnei</i>           | 1.79        |
| <i>Shigella sonnei</i>          | 1.79        | <i>Shigella flexneri</i>          | 1.86        | <i>Ralstonia</i> sp.            | 1.35        | <i>Shigella</i> sp. D9           | 1.61        |
| <i>Shigella flexneri</i>        | 1.65        | <i>Shigella boydii</i>            | 1.85        | <i>Mycoplasma hominis</i>       | 1.31        | <i>Shigella dysenteriae</i>      | 1.60        |
| <i>Streptococcus pneumoniae</i> | 1.64        | <i>Shigella dysenteriae</i>       | 1.77        | <i>Pseudomonas aeruginosa</i>   | 1.31        | <i>Escherichia</i> sp. 4_1_40B   | 1.59        |
| <i>Enterococcus faecium</i>     | 1.59        | <i>Shigella</i> sp. D9            | 1.77        | <i>Ralstonia</i> sp. 5_7_47FAA  | 1.30        | <i>Shigella</i> sp.              | 1.59        |
| <i>Citrobacter koseri</i>       | 1.56        | <i>Shigella sonnei</i>            | 1.76        | <i>Proteus mirabilis</i>        | 1.28        | <i>Enterococcus faecium</i>      | 1.47        |
| <i>Shigella boydii</i>          | 1.54        | <i>Shigella</i> sp.               | 1.76        | <i>Enterococcus</i> sp. 7L76    | 1.17        | <i>Salmonella enterica</i>       | 1.36        |
| <i>Citrobacter</i> sp. 30_2     | 1.36        | <i>Staphylococcus epidermidis</i> | 1.32        | <i>Streptococcus agalactiae</i> | 0.95        | <i>Shigella flexneri</i>         | 1.35        |
| <i>Shigella</i> sp. D9          | 1.15        | <i>Ralstonia</i> sp. 5_7_47FAA    | 1.28        | <i>Neisseria meningitidis</i>   | 0.94        | Bacterium RRLBTPL IV-3           | 1.25        |
| <i>Shigella</i> sp.             | 1.15        | <i>Ralstonia</i> sp.              | 1.28        | <i>Streptococcus pyogenes</i>   | 0.93        | <i>Lactobacillus acidophilus</i> | 1.19        |
| <i>Streptococcus sanguinis</i>  | 1.13        | <i>Enterococcus faecium</i>       | 1.09        | <i>Streptococcus pneumoniae</i> | 0.74        | <i>Ralstonia</i> sp.             | 1.14        |
| <i>Klebsiella pneumoniae</i>    | 1.02        | <i>Escherichia</i> sp. 1_1_43     | 1.00        | <i>Escherichia</i> sp. 4_1_40B  | 0.71        | <i>Shigella boydii</i>           | 1.13        |

Shown are bacterial species identified in 4 different clinical diagnosis categories including T1DM (Type 1 Diabetes Mellitus); T2DM (Type 2 Diabetes Mellitus); HTN (Hypertension) and “Other” includes the combined category for FSGS, Nephrocalcinosis, PKD, RN, Lupus and vasculitis (Table 1). The first 20 species are selected on the basis of >1% abundance in the clinical diagnosis category “Other”. Bacterial species identified in at least 3 diagnostic category are shaded. Statistical analysis was performed using ANOVA with Tukey’s multiple comparison post-test. No significant differences were observed.

**Table S5. Statistics of the abundance of bacterial species in each diagnostic category compared with controls.**

| <b>Table analyzed</b>                   | <b>Comparison at the species level in 4 clinical diagnosis categories with control</b> |          |                                |                |                       |
|-----------------------------------------|----------------------------------------------------------------------------------------|----------|--------------------------------|----------------|-----------------------|
| One-way analysis of variance            |                                                                                        |          |                                |                |                       |
| P value                                 | < 0.0001                                                                               |          |                                |                |                       |
| P value summary                         | ***                                                                                    |          |                                |                |                       |
| Are means signif. different (P < 0.05)  | Yes                                                                                    |          |                                |                |                       |
| Number of groups                        | 5                                                                                      |          |                                |                |                       |
| F                                       | 10.74                                                                                  |          |                                |                |                       |
| R squared                               | 0.64                                                                                   |          |                                |                |                       |
| ANOVA Table                             | SS                                                                                     | df       | MS                             |                |                       |
| Treatment (between columns)             | 24.19                                                                                  | 4        | 6.05                           |                |                       |
| Residual (within columns)               | 13.52                                                                                  | 24       | 0.56                           |                |                       |
| Total                                   | 37.71                                                                                  | 28       |                                |                |                       |
| <b>Tukey's Multiple Comparison Test</b> | <b>Mean Diff.</b>                                                                      | <b>q</b> | <b>Significant P &lt; 0.05</b> | <b>Summary</b> | <b>95% CI of diff</b> |
| T1DM vs T2DM                            | -0.23                                                                                  | 0.53     | No                             | ns             | -2.037 to 1.573       |
| T1DM vs HTN                             | 0.19                                                                                   | 0.51     | No                             | ns             | -1.338 to 1.713       |
| T1DM vs Other                           | 0.55                                                                                   | 1.52     | No                             | ns             | -0.9516 to 2.042      |
| T2DM vs HTN                             | 0.42                                                                                   | 1.15     | No                             | ns             | -1.106 to 1.945       |
| T2DM vs Other                           | 0.78                                                                                   | 2.16     | No                             | ns             | -0.7199 to 2.273      |
| HTN vs Other                            | 0.36                                                                                   | 1.30     | No                             | ns             | -0.7867 to 1.502      |
| T1DM vs Control                         | -1.74                                                                                  | 4.84     | Yes                            | *              | -3.234 to -0.2407     |
| T2DM vs Control                         | -1.51                                                                                  | 4.19     | Yes                            | *              | -3.002 to -0.009023   |
| HTN vs Control                          | -1.93                                                                                  | 7.01     | Yes                            | ***            | -3.069 to -0.7809     |
| Other vs Control                        | -2.28                                                                                  | 8.60     | Yes                            | ***            | -3.388 to -1.177      |

Shannon index is significantly different in control group compared to 4 transplant diagnosis categories. No significant differences were observed among the 4 transplant diagnosis categories. Different clinical diagnosis categories are T1DM (Type 1 Diabetes Mellitus); T2DM (Type 2 Diabetes Mellitus); HTN (Hypertension) and “Other” includes the combined category for FSGS, Nephrocalcinosis, PKD, RN, Lupus and vasculitis (Table 1). The significance of the difference was computed using ANOVA with Tukey’s multiple comparison test. Asterisks indicate significant differences at species level (\*p<0.05, \*\*\*p<0.0001).

**Table S6. Statistics of the abundance of KEGG Level 1 categories.**

| <b>Level 1 KEGG categories</b>       | <b>Transplant</b> | <b>Control</b> |
|--------------------------------------|-------------------|----------------|
| Metabolism                           | 61.1              | 58.0           |
| Environmental information processing | 18.7              | 18.2           |
| Genetic information processing       | 12.7              | 15.7           |
| Cellular processes                   | 5.4               | 5.9            |
| Human diseases                       | 1.3               | 1.9            |
| Organismal systems                   | 0.7               | 0.3            |

Shown are relative abundance of KEGG assignments identified in transplant and control group. Using Wilcoxon Rank test ( $p$  corrected  $<0.05$ ) no significant differences between the metabolic categories were observed at Level 1.
